# Supplementary material for: Micro-computed tomography imaging reveals the development of a unique tooth mineralization pattern in mackerel sharks (Chondrichthyes; Lamniformes) in deep time
Source: PubMed Central journal article supplement (PMC6609643; doi:10.1038/s41598-019-46081-3), 2019-07-04
Supplement: 41598_2019_46081_MOESM1_ESM.pdf [file 41598_2019_46081_MOESM1_ESM.pdf]

**Micro-computed tomography imaging reveals the development of a  
unique tooth mineralization pattern in mackerel sharks  
(Chondrichthyes; Lamniformes) in deep time.**

Patrick L. Jambura<sup>1\*</sup>, René Kindlimann<sup>2</sup>, Faviel López-Romero<sup>1</sup>, Giuseppe Marramà<sup>1</sup>,  
Cathrin Pfaff<sup>1</sup>, Sebastian Stumpf<sup>1</sup>, Julia Türtscher<sup>1</sup>, Charlie J. Underwood<sup>3</sup>, David J. Ward<sup>4</sup>,  
Jürgen Kriwet<sup>1</sup>

**Affiliations**

<sup>1</sup>Department of Palaeontology, University of Vienna, Vienna, Austria

<sup>2</sup>Haimuseum und Sammlung R. Kindlimann, Aathal-Seegräben, Switzerland

<sup>3</sup>Department of Earth and Planetary Sciences, Birkbeck, University of London,  
London, UK

<sup>4</sup>Department of Earth Sciences, Natural History Museum, London, UK

**Corresponding Author**

[\\*patrick.jambura@gmail.com](mailto:*patrick.jambura@gmail.com)

**Short Title**

Evolution of the tooth mineralization in lamniform sharks

## **Supplementary Information**

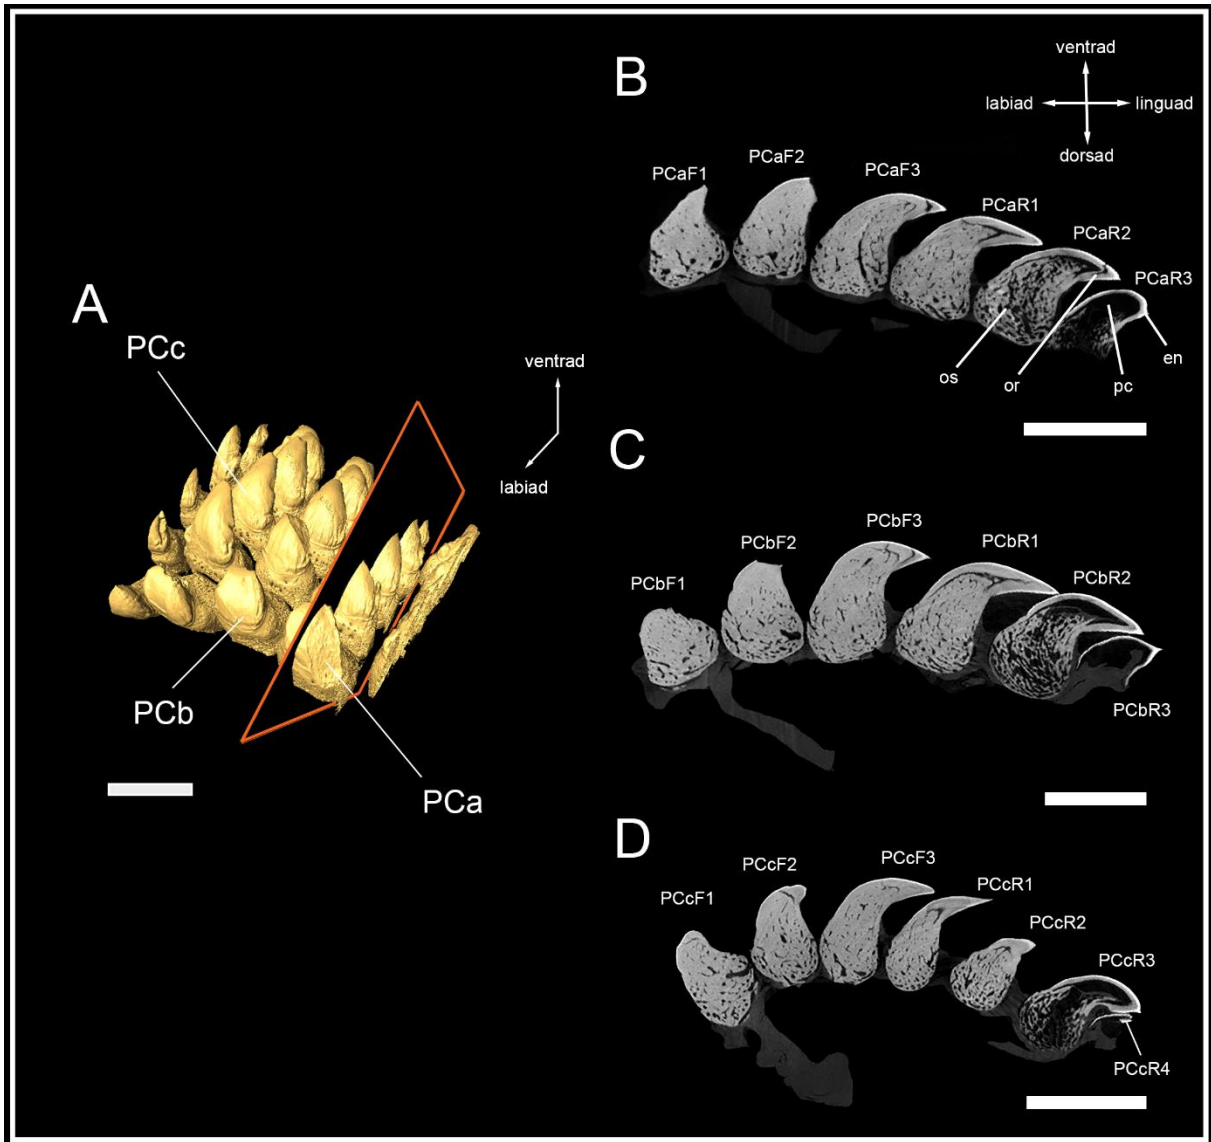

**Figure S1. Virtual tooth file sections of *Cetorhinus maximus*.** (A) isosurface; (B) first tooth file (Pca); (C) second tooth file (PCb); (D) third tooth file (PCc). en, enameloid; F1, first functional tooth; F2, second functional tooth; F3, third functional tooth; R1, first replacement tooth; R2, second replacement tooth; R3, third replacement tooth; R4, fourth replacement tooth; or, orthodontine; os, osteodontine; pc, pulp cavity; PC, palatoquadrate cartilage; scalebar = 0.5 cm.

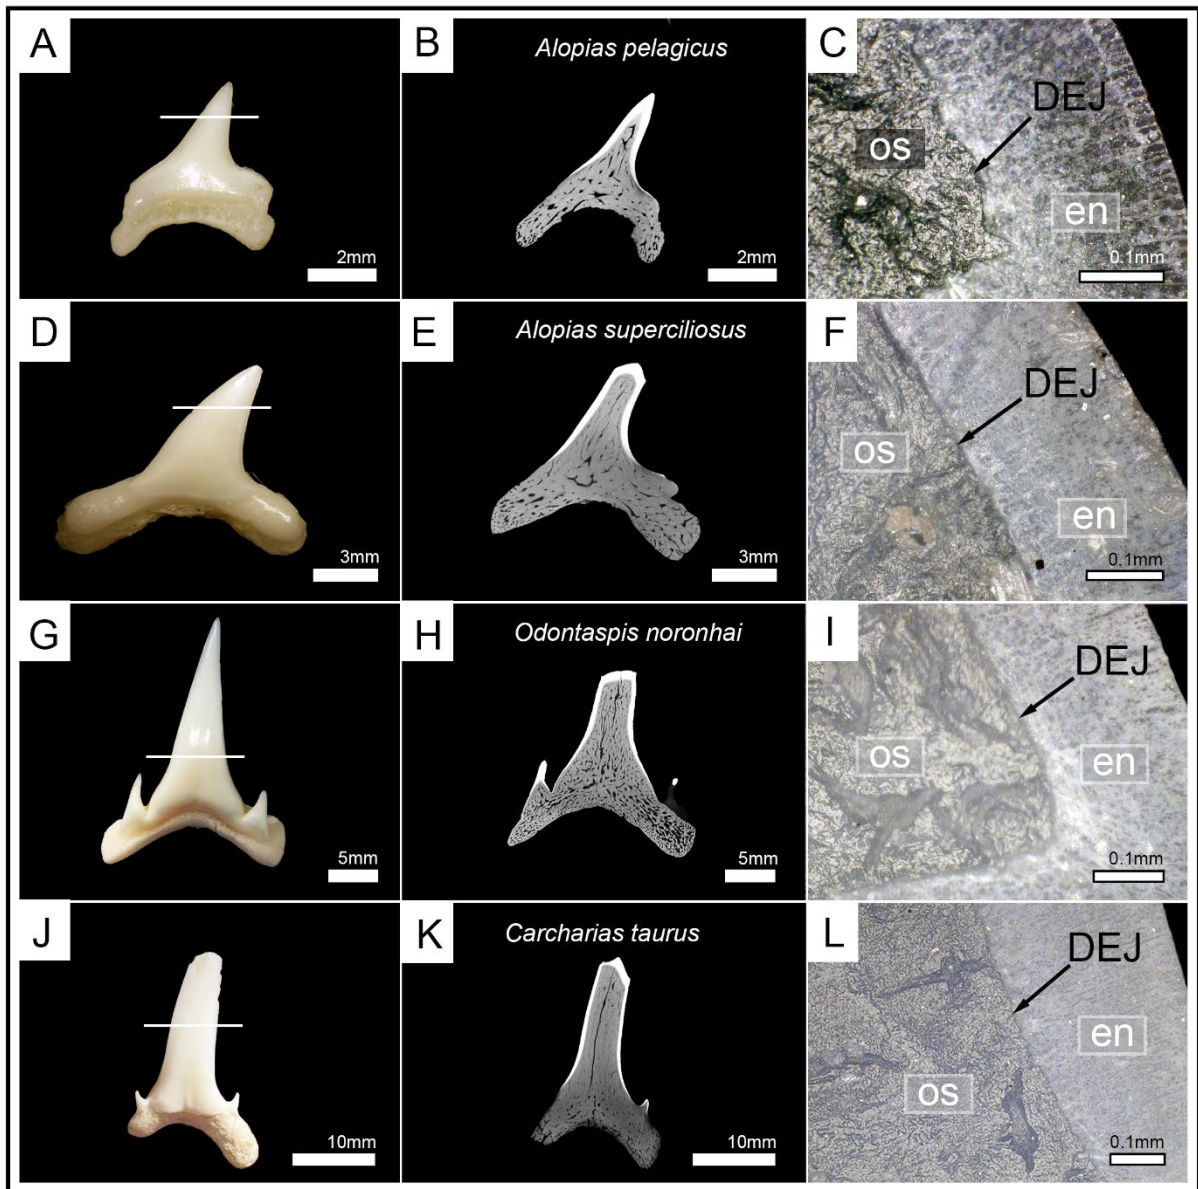

**Figure S2. Micro-CT images and tooth sections of extant lamniform sharks.** (A-C) *Alopias pelagicus* (EMRG-Chond-T-25); (D-F) *Alopias superciliosus* (EMRG-Chond-T-26); (G-I) *Odontaspis noronhai* (EMRG-Chond-T-3); (J-L) *Carcharias taurus* (EMRG-Chond-T-5); white lines through the tooth indicate the plane of the tooth section; en, enameloid; os, osteodentine.

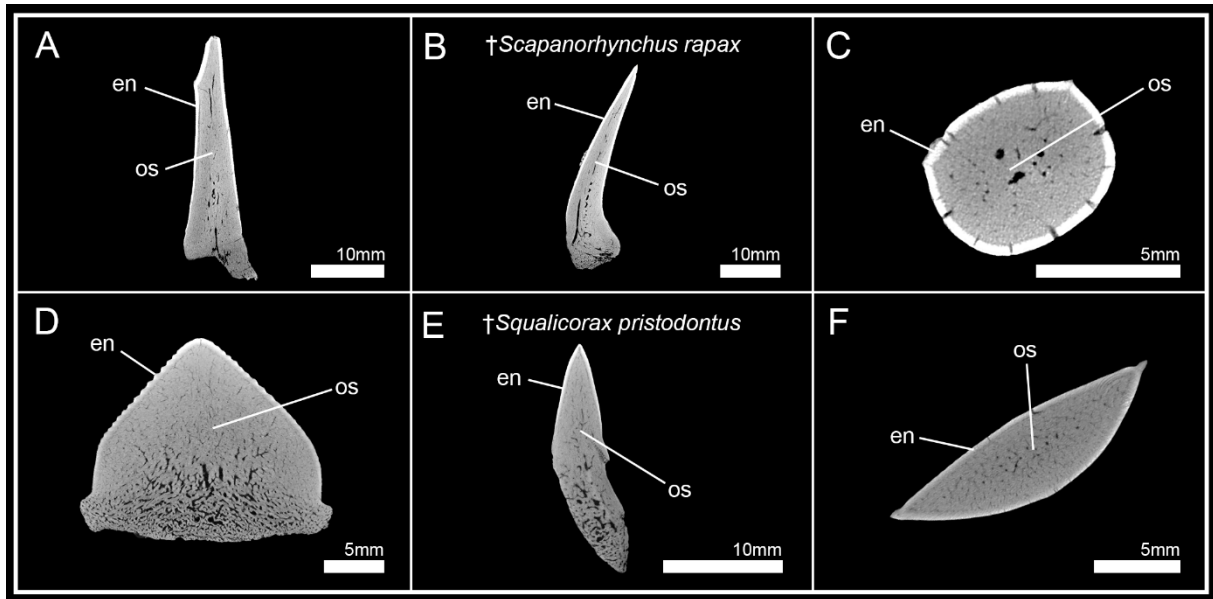

**Figure S3. Micro-CT images of extinct lamniform sharks in frontal, sagittal, and axial view:** (A-C) *†Scapanorhynchus rapax* (EMRG-Chond-T-49); (D-F) *†Squalicorax pristodontus* (EMRG-Chond-T-46); en, enameloid; os, osteodentine.

**Table S1. Synopsis of the tooth histology of fossil and extant lamniform sharks.** Only publications providing photographs or CT-images with proper quality to unambiguously show the presence or absence of orthodentine were considered here.

| Species                               | Family                    | Time                          | Histology       | Source                                                                |
|---------------------------------------|---------------------------|-------------------------------|-----------------|-----------------------------------------------------------------------|
| <i>Alopias pelagicus</i>              | Alopiidae                 | recent                        | osteodont       | Fig. S1 online                                                        |
| <i>Alopias superciliosus</i>          | Alopiidae                 | recent                        | osteodont       | Fig. S1 online; Schnetz et al. 2016                                   |
| <i>Alopias vulpinus</i>               | Alopiidae                 | recent                        | osteodont       | Fig. 3                                                                |
| <i>Carcharias taurus</i>              | Odontaspidae              | recent                        | osteodont       | Fig. S1 online                                                        |
| <i>Carcharodon carcharias</i>         | Lamnidae                  | recent                        | osteodont       | Goto 1999; Moyer et al 2015a; Moyer et al. 2015b; Schnetz et al. 2016 |
| <i>Cetorhinus maximus</i>             | Cetorhinidae              | recent                        | pseudoosteodont | Figs 1 & 2                                                            |
| <i>Isurus oxyrinchus</i>              | Lamnidae                  | recent                        | osteodont       | Schnetz et al. 2016; Jambura et al. 2018                              |
| <i>Lamna ditropis</i>                 | Lamnidae                  | recent                        | osteodont       | Kazikawa 1984                                                         |
| <i>Lamna nasus</i>                    | Lamnidae                  | recent                        | osteodont       | Fig; 3; Moyer et al. 2015b; Schnetz et al. 2016                       |
| <i>Megachasma pelagios</i>            | Megachasmidae             | recent                        | osteodont       | Yabumoto et al. 1997; Goto 1999                                       |
| <i>Megachasma pelagios</i>            | Megachasmidae             | Pliocene, Neogene             | osteodont       | Fig 4                                                                 |
| <i>Mitsukurina owstoni</i>            | Mitsukurinidae            | recent                        | osteodont       | Fig 3                                                                 |
| <i>Odontaspis ferox</i>               | Odontaspidae              | recent                        | osteodont       | Fig. 3                                                                |
| <i>Odontaspis noronhai</i>            | Odontaspidae              | recent                        | osteodont       | Fig. S1 online                                                        |
| <i>Pseudocarcharias kamoharai</i>     | Pseudocarchariidae        | recent                        | osteodont       | Figs. 1 & 2                                                           |
| † <i>Otodus megalodon</i>             | Otodontidae               | Miocene, Neogene              | osteodont       | Fig 5                                                                 |
| † <i>Cretalamna appendiculata</i>     | Cretoxyrinidae?           | Cretaceous                    | osteodont       | Schnetz et al. 2016                                                   |
| † <i>Dwardius woodwardi</i>           | inc. sed.                 | Albian, Cretaceous            | osteodont       | Fig 5                                                                 |
| † <i>Leptostyrax sp.</i>              | Eoptolamnidae             | Albian/Cenomanian, Cretaceous | osteodont       | Fig 4                                                                 |
| † <i>Palaeocarcharias stromeri</i>    | inc. sed.                 | Tithonian, Jurassic           | osteodont       | Fig 6; de Beaumont 1960, Landemaine et al. 2018                       |
| † <i>Palaeocarcharodon orientalis</i> | Lamniformes incertae fam. | Eocene, Paleogene             | osteodont       | Fig 4                                                                 |
| † <i>Protolamna sokolovi</i>          | Eoptolamnidae             | Albian, Cretaceous            | osteodont       | Schnetz et al. 2016                                                   |
| † <i>Scapanorhynchus rapax</i>        | Mitsukurinidae            | Maastrichtian, Cretaceous     | osteodont       | Fig. S2 online                                                        |
| † <i>Squalicorax curvatus</i>         | Anacoracidae              | Cretaceous                    | osteodont       | Hoffman et al. 2016                                                   |
| † <i>Squalicorax primaevus</i>        | Anacoracidae              | Albian, Cretaceous            | osteodont       | Fig 5                                                                 |
| † <i>Squalicorax pristodontus</i>     | Anacoracidae              | Maastrichtian, Cretaceous     | osteodont       | Fig. S2 online;                                                       |
| † <i>Striatolamia macrota</i>         | Odontaspidae              | Paleocene-Eocene              | osteodont       | Møller et al. 1975                                                    |
| † <i>Truyolsodontos estauni</i>       | Truyolsodontidae          | Cenomanian, Cretaceous        | osteodont       | Bernardez 2018                                                        |

**Table S2. Tooth mineralization sequence of the upper jaws of the basking shark (*Cetorhinus maximus* (7-692/RZ)) and the crocodile shark (*Pseudocarcharias kamoharai* (7-693/RZ)).** Colours indicate similar mineralization stages.

|                                   | Tooth  | enameloid  | orthodontine       | pulp cavity          | root               |
|-----------------------------------|--------|------------|--------------------|----------------------|--------------------|
| <i>Cetorhinus maximus</i>         | PCaF1  | complete   | fully mineralized  | cavity fully filled  | fully mineralized  |
|                                   | PCaF2  | complete   | fully mineralized  | cavity fully filled  | fully mineralized  |
|                                   | PCaF3  | complete   | fully mineralized  | cavity fully filled  | fully mineralized  |
|                                   | PCaR1  | complete   | fully mineralized  | cavity partly filled | fully mineralized  |
|                                   | PCaR2  | complete   | partly mineralized | cavity partly filled | partly mineralized |
|                                   | PCaR3  | complete   | partly mineralized | cavity partly filled | partly mineralized |
| <i>Pseudocarcharias kamoharai</i> | LPC1F1 | complete   | Absent             | cavity fully filled  | fully mineralized  |
|                                   | LPC1F2 | complete   | Absent             | cavity fully filled  | fully mineralized  |
|                                   | LPC1R1 | complete   | Absent             | cavity fully filled  | fully mineralized  |
|                                   | LPC1R2 | complete   | Absent             | cavity partly filled | partly mineralized |
|                                   | LPC1R3 | complete   | Absent             | cavity partly filled | partly mineralized |
|                                   | LPC1R4 | complete   | Absent             | Hollow               | absent             |
|                                   | LPC1R5 | incomplete | Absent             | Hollow               | absent             |
|                                   | LPC1R6 | incomplete | Absent             | Hollow               | absent             |

**Table S3. Tooth mineralization sequence in the crocodile shark (*Pseudocarcharias kamoharai*). L, left; PC, palatoquadrate cartilage; F, functional tooth; R, replacement tooth**

***Pseudocarcharias kamoharai***

|  | <b>tooth</b> | <b>enameloid</b> | <b>orthodontine</b> | <b>pulp cavity</b>   | <b>root</b>        |
|--|--------------|------------------|---------------------|----------------------|--------------------|
|  | LPC1F1       | complete         | absent              | cavity fully filled  | fully mineralized  |
|  | LPC1F2       | complete         | absent              | cavity fully filled  | fully mineralized  |
|  | LPC1R1       | complete         | absent              | cavity fully filled  | fully mineralized  |
|  | LPC1R2       | complete         | absent              | cavity partly filled | partly mineralized |
|  | LPC1R3       | complete         | absent              | cavity partly filled | partly mineralized |
|  | LPC1R4       | complete         | absent              | hollow               | absent             |
|  | LPC1R5       | incomplete       | absent              | hollow               | absent             |
|  | LPC1R6       | incomplete       | absent              | hollow               | absent             |
|  | LPC2F1       | complete         | absent              | cavity fully filled  | fully mineralized  |
|  | LPC2F2       | complete         | absent              | cavity fully filled  | fully mineralized  |
|  | LPC2R1       | complete         | absent              | cavity fully filled  | fully mineralized  |
|  | LPC2R2       | complete         | absent              | cavity partly filled | partly mineralized |
|  | LPC2R3       | complete         | absent              | cavity partly filled | partly mineralized |
|  | LPC2R4       | complete         | absent              | hollow               | absent             |
|  | LPC2R5       | incomplete       | absent              | hollow               | absent             |
|  | LPC2R6       | incomplete       | absent              | hollow               | absent             |
|  | LPC3R1       | complete         | absent              | cavity fully filled  | fully mineralized  |
|  | LPC3R2       | complete         | absent              | cavity partly filled | partly mineralized |
|  | LPC3R3       | complete         | absent              | cavity partly filled | partly mineralized |
|  | LPC3R4       | complete         | absent              | hollow               | absent             |
|  | LPC3R5       | incomplete       | absent              | hollow               | absent             |
|  | LPC4F1       | complete         | absent              | cavity fully filled  | fully mineralized  |
|  | LPC4R1       | complete         | absent              | cavity fully filled  | fully mineralized  |
|  | LPC4R2       | complete         | absent              | cavity partly filled | partly mineralized |
|  | LPC4R3       | complete         | absent              | hollow               | absent             |
|  | LPC4R4       | incomplete       | absent              | hollow               | absent             |
|  | LPC4R5       | incomplete       | absent              | hollow               | absent             |



**Table S4. Tooth mineralization sequence in the basking shark (*Cetorhinus maximus*).**

L, left; PC, palatoquadrate cartilage; F, functional tooth; R, replacement tooth

***Cetorhinus maximus***

|  | <b>tooth</b> | <b>enameloid</b> | <b>orthodontine</b> | <b>pulp cavity</b>   | <b>root</b>        |
|--|--------------|------------------|---------------------|----------------------|--------------------|
|  | PCaF1        | complete         | fully mineralized   | cavity fully filled  | fully mineralized  |
|  | PCaF2        | complete         | fully mineralized   | cavity fully filled  | fully mineralized  |
|  | PCaF3        | complete         | fully mineralized   | cavity fully filled  | fully mineralized  |
|  | PCaR1        | complete         | fully mineralized   | cavity partly filled | fully mineralized  |
|  | PCaR2        | complete         | partly mineralized  | cavity partly filled | partly mineralized |
|  | PCaR3        | complete         | partly mineralized  | cavity partly filled | partly mineralized |
|  | PCbF1        | complete         | fully mineralized   | cavity fully filled  | fully mineralized  |
|  | PCbF2        | complete         | fully mineralized   | cavity fully filled  | fully mineralized  |
|  | PCbF3        | complete         | fully mineralized   | cavity fully filled  | fully mineralized  |
|  | PCbR1        | complete         | fully mineralized   | cavity partly filled | fully mineralized  |
|  | PCbR2        | complete         | partly mineralized  | cavity partly filled | partly mineralized |
|  | PCbR3        | complete         | absent              | hollow               | absent             |
|  | PCcF1        | complete         | fully mineralized   | cavity fully filled  | fully mineralized  |
|  | PCcF2        | complete         | fully mineralized   | cavity fully filled  | fully mineralized  |
|  | PCcF3        | complete         | fully mineralized   | cavity fully filled  | fully mineralized  |
|  | PCcF4        | complete         | fully mineralized   | cavity fully filled  | fully mineralized  |
|  | PCcR1        | complete         | fully mineralized   | cavity partly filled | partly mineralized |
|  | PCcR2        | complete         | partly mineralized  | cavity partly filled | partly mineralized |
|  | PCcR3        | incomplete       | absent              | hollow               | absent             |

**Table S5. Examined jaws and teeth of extinct and extant lamniform sharks.** JME-SOS-2294 is the holotypic specimen of †*Palaeocarcharias stromeri* and is deposited in the collection of the Jura-Museum Eichstätt. Specimens with accession numbers starting with Inv.nr are deposited in the collection of the Haimuseum und Sammlung R. Kindlimann. The remaining specimens are deposited in the collection of the Department of Palaeontology at the University of Vienna. All specimens are publicly accessible.

| Species                               | Family                       | Material | Accession number | Age                                        | Locality                                     |
|---------------------------------------|------------------------------|----------|------------------|--------------------------------------------|----------------------------------------------|
| † <i>Otodus megalodon</i>             | Otodontidae                  | Tooth    | Emrg-chond-t-57  | Miocene, neogene (5-23 mya)                | No detailed locality information, usa        |
| † <i>Dwardius woodwardi</i>           | Inc. Sed.                    | Tooth    | Emrg-chond-t-53  | Albian, cretaceous (101-113 mya)           | Gault clay formation, uk                     |
| † <i>Leptostyrax</i> sp.              | Eoptolamnidae                | Tooth    | Inv.nr. 7-690    | Albian/cenomanian, cretaceous (94-113 mya) | Kem kem beds, morocco                        |
| † <i>Palaeocarcharias stromeri</i>    | Inc. Sed.                    | Tooth    | Sos_2294_22_2    | Tithonian, jurassic (145-152 mya)          | Eichstätt, germany                           |
| † <i>Palaeocarcharodon orientalis</i> | Lamniformes<br>incertae fam. | Tooth    | Emrg-chond-t-50  | Eocene, paleogene (34-56)                  | Khouribga, morocco                           |
| † <i>Scapanorhynchus rapax</i>        | Mitsukurinidae               | Tooth    | Emrg-chond-t-49  | Maastrichtian, cretaceous (66-72 mya)      | Khouribga, morocco                           |
| † <i>Squalicorax primaevus</i>        | Anacoracidae                 | Tooth    | Emrg-chond-t-54  | Albian, cretaceous (101-113 mya)           | Naccolt, uk                                  |
| † <i>Squalicorax pristodontus</i>     | Anacoracidae                 | Tooth    | Emrg-chond-t-46  | Maastrichtian, cretaceous (66-72 mya)      | No detailed locality information,<br>morocco |
| <i>Alopias pelagicus</i>              | Alopiidae                    | Tooth    | Emrg-chond-t-25  | Recent                                     | Philippines                                  |
| <i>Alopias superciliosus</i>          | Alopiidae                    | Tooth    | Emrg-chond-t-26  | Recent                                     | Indian ocean                                 |
| <i>Alopias vulpinus</i>               | Alopiidae                    | Tooth    | Emrg-chond-t-27  | Recent                                     | North sea                                    |
| <i>Carcharias taurus</i>              | Odontaspidae                 | Tooth    | Emrg-chond-t-5   | Recent                                     | Aquarium la rochelle, france                 |
| <i>Cetorhinus maximus</i>             | Cetorhinidae                 | Jaw      | Inv.nr. 7-692/rz | Recent                                     | China                                        |
| <i>Cetorhinus maximus</i>             | Cetorhinidae                 | Tooth    | Emrg-chond-t-24  | Recent                                     | No locality information                      |
| <i>Lamna nasus</i>                    | Lamnidae                     | Tooth    | Emrg-chond-t-4   | Recent                                     | Scottish north sea                           |
| <i>Megachasma pelagios</i>            | Megachasmidae                | Tooth    | Emrg-chond-t-44  | Pliocene, neogene (2-5 mya)                | Bahia ingles formaton, chile                 |
| <i>Mitsukurina</i>                    | Owstoni                      | Tooth    | Emrg-chond-t-1   | Recent                                     | Philippines                                  |
| <i>Odontaspis ferox</i>               | Odontaspidae                 | Tooth    | Emrg-chond-t-2   | Recent                                     | Taiwan                                       |
| <i>Odontaspis noronhai</i>            | Odontaspidae                 | Tooth    | Emrg-chond-t-3   | Recent                                     | Indian ocean                                 |
| <i>Pseudocarcharias kamoharai</i>     | Pseudocarchariidae           | Jaw      | Inv.nr. 7-693/rz | Recent                                     | Pacific                                      |
| <i>Pseudocarcharias kamoharai</i>     | Pseudocarchariidae           | Tooth    | Emrg-chond-t-28  | Recent                                     | Philippines                                  |

**Table S6. Applied settings for the micro-CT scanner Bruker SkyScan1173 (Kontich, Belgium)**

| Species                               | Material | Age        | Inventory-no     | Voxel size [µm] | Source-voltage [kv] | Source current [µa] | Filter       | Exposure time [ms] | Rotation step [°] | Frame averaging |
|---------------------------------------|----------|------------|------------------|-----------------|---------------------|---------------------|--------------|--------------------|-------------------|-----------------|
| † <i>Otodus megalodon</i>             | tooth    | Neogene    | EMRG-Chond-T-57  | 30,042382       | 130                 | 61                  | brass 0.25mm | 1249               | 0,2               | 3               |
| † <i>Dwardius woodwardi</i>           | tooth    | Cretaceous | EMRG-Chond-T-53  | 17,882692       | 100                 | 80                  | Al 1.0mm     | 750                | 0,2               | 3               |
| † <i>Leptostyrax</i> sp.              | tooth    | Cretaceous | Inv.nr. 7-690    | 17,168527       | 100                 | 80                  | Al 1.0mm     | 750                | 0,2               | 3               |
| † <i>Palaeocarcharias stromeri</i>    | tooth    | Jurassic   | SOS_2294_22_2    | 6,438884        | 80                  | 100                 | no Filter    | 650                | 0,2               | 3               |
| † <i>Palaeocarcharodon orientalis</i> | tooth    | Paleogene  | EMRG-Chond-T-50  | 23,247514       | 100                 | 80                  | Al 1.0mm     | 750                | 0,2               | 3               |
| † <i>Scapanorhynchus rapax</i>        | tooth    | Cretaceous | EMRG-Chond-T-49  | 19,695573       | 100                 | 80                  | Al 1.0mm     | 750                | 0,2               | 3               |
| † <i>Squalicorax primaevus</i>        | tooth    | Cretaceous | EMRG-Chond-T-54  | 7,868931        | 50                  | 100                 | User Filter  | 1100               | 0,2               | 3               |
| † <i>Squalicorax pristodontus</i>     | tooth    | Cretaceous | EMRG-Chond-T-46  | 17,882692       | 100                 | 80                  | Al 1.0mm     | 750                | 0,2               | 3               |
| <i>Alopias pelagicus</i>              | tooth    | recent     | EMRG-Chond-T-25  | 6,438884        | 80                  | 100                 | no Filter    | 650                | 0,2               | 3               |
| <i>Alopias superciliosus</i>          | tooth    | recent     | EMRG-Chond-T-26  | 7,511849        | 80                  | 100                 | no Filter    | 650                | 0,2               | 3               |
| <i>Alopias vulpinus</i>               | tooth    | recent     | EMRG-Chond-T-27  | 7,511849        | 80                  | 100                 | no Filter    | 650                | 0,2               | 3               |
| <i>Carcharias taurus</i>              | tooth    | recent     | EMRG-Chond-T-5   | 12,87667        | 80                  | 100                 | no Filter    | 650                | 0,2               | 3               |
| <i>Cetorhinus maximus</i>             | jaw      | recent     | Inv.nr. 7-692/RZ | 15,022599       | 100                 | 80                  | Al 1.0mm     | 750                | 0,2               | 5               |
| <i>Cetorhinus maximus</i>             | tooth    | recent     | EMRG-Chond-T-24  | 6,438884        | 80                  | 100                 | no Filter    | 650                | 0,2               | 3               |
| <i>Lamna nasus</i>                    | tooth    | recent     | EMRG-Chond-T-4   | 12,160788       | 80                  | 100                 | no Filter    | 650                | 0,2               | 3               |
| <i>Megachasma pelagios</i>            | tooth    | Neogene    | EMRG-Chond-T-44  | 11,087824       | 100                 | 80                  | Al 1.0mm     | 750                | 0,2               | 3               |
| <i>Mitsukurina</i>                    | tooth    | recent     | EMRG-Chond-T-1   | 13,894228       | 80                  | 100                 | no Filter    | 650                | 0,2               | 3               |
| <i>Odontaspis ferox</i>               | tooth    | recent     | EMRG-Chond-T-2   | 13,894228       | 80                  | 100                 | no Filter    | 650                | 0,2               | 3               |
| <i>Odontaspis noronhai</i>            | tooth    | recent     | EMRG-Chond-T-3   | 13,894228       | 80                  | 100                 | no Filter    | 650                | 0,2               | 3               |
| <i>Pseudocarcharias kamoharai</i>     | jaw      | recent     | Inv.nr. 7-693/RZ | 23,963395       | 100                 | 80                  | Al 1.0mm     | 750                | 0,2               | 3               |
| <i>Pseudocarcharias kamoharai</i>     | tooth    | recent     | EMRG-Chond-T-28  | 7,868931        | 80                  | 100                 | no Filter    | 650                | 0,2               | 3               |

**Table S7. Accession numbers of the mitochondrial DNA sequences used to build the tree.**

| Species                           | GenBank ID |
|-----------------------------------|------------|
| <i>Alopias pelagicus</i>          | KF020876.1 |
| <i>Alopias superciliosus</i>      | KC757415.1 |
| <i>Alopias vulpinus</i>           | MF374733.1 |
| <i>Carcharhinus leucas</i>        | KF646785.1 |
| <i>Carcharhinus melanopterus</i>  | KJ720818.1 |
| <i>Carcharhinus obscurus</i>      | KC470543.1 |
| <i>Carcharhinus plumbeus</i>      | KJ740750.1 |
| <i>Carcharias taurus</i>          | MH823675.1 |
| <i>Carcharodon carcharias</i>     | KY067590.1 |
| <i>Cetorhinus maximus</i>         | KM096988.1 |
| <i>Galeocerdo cuvier</i>          | KF111728.1 |
| <i>Ginglymostoma cirratum</i>     | KU904394.1 |
| <i>Hemigaleus microstoma</i>      | KT003687.1 |
| <i>Hemipristis elongata</i>       | KU508621.1 |
| <i>Heterodontus francisci</i>     | AJ310141.1 |
| <i>Heterodontus zebra</i>         | KC845548.1 |
| <i>Isurus oxyrinchus</i>          | KF361861.1 |
| <i>Lamna ditropis</i>             | KF962053.1 |
| <i>Lamna nasus</i>                | KX610464.1 |
| <i>Megachasma pelagios</i>        | KC702506.1 |
| <i>Mitsukurina owstoni</i>        | EU528659.1 |
| <i>Nebrius ferrugineus</i>        | KT852575.1 |
| <i>Prionace glauca</i>            | KF356249.1 |
| <i>Pseudocarcharias kamoharai</i> | KM575726.1 |
| <i>Rhincodon typus</i>            | KC633221.1 |
| <i>Sphyrna zygaena</i>            | KM489157.1 |
| <i>Stegostoma fasciatum</i>       | KU057952.1 |

## Supplementary Discussion S1: The phylogenetic relationships of †*Palaeocarcharias stromeri*

Despite the complete nature of the fossil specimens, only a few studies attempted to clarify the relationships of †*Palaeocarcharias*. In the original description (De Beaumont 1960) and subsequent literature (Cappetta, 1987, 2012; Duffin 1988) †*P. stromeri* was considered as basal lamniform or in any case related to lamniform sharks, or alternatively as member of orectolobiforms (Duffin 1988), or as a transitional form between orectolobiforms and lamniforms (Applegate 2001). However, the phylogenetic position of †*Palaeocarcharias* has never been tested using cladistics method until recently, when Landemaine et al. (2018) included this taxon in a phylogenetic framework employing Bayesian methodologies. The phylogenetic analysis of Landemaine et al. (2018) was based on a dataset of 198 morphological characters, 169 of which were taken directly from the dataset of Klug (2010), 21 from Shirai (1996) and eight newly introduced. The ingroup taxa of Landemaine et al. (2018) included almost all the ingroup taxa used by Klug (2010) representing all major elasmobranch orders with the inclusion of the †Synchodontiformes and the †Hybodontiformes, the latter used as outgroup by Klug (2010) and replaced with Rajiformes by Landemaine et al. (2018). The analysis of Landemaine et al. (2018) detected †*Palaeocarcharias* nested within the galeomorph sharks and as sister to the pair formed by Lamniformes plus Carcharhiniformes and sharing with them two tooth characters: holaulacorhizous vascularization pattern and the absence of a lingual tooth uvula.

However, our crosschecking of the data matrix of Landemaine et al. (2018) executed with WinClada 1.00.08 (Nixon 2002) detected a significant amount of uninformative characters (62, corresponding to 31.3% of the total). We then rerun the analysis using the remaining 136 informative characters (see the new character list below). The new matrix was compiled in MESQUITE v.3.03 (Maddison & Maddison, 2008) and the phylogenetic analysis was performed with WinClada and TNT 1.5 using several methods (branch-and-bound, heuristic search, etc) (Nixon 2002; Goloboff et al., 2008). All characters are here considered unordered and given equal weight.

The analysis of 136 morphological characters coded for 20 taxa produced always, even with different methods, a single most parsimonious tree (MPT) whose length is shorter (TL=278) than using the complete character list (TL=330) (Supplementary Fig. S4 online). The phylogenetic hypothesis is supported by the following indices: consistency index of 0.61, and retention index of 0.74. The retrieved relationships positions of †*Palaeocarcharias* within the phylogenetic tree of all our analyses are not consistent with those of Landemaine et al. (2018). In fact, our analysis detected †*Palaeocarcharias* as basal to all living galeomorph sharks, sister to (Carcharhiniformes+Lamniformes) + (Orectolobiformes+*Heterodontus*). Detection of

†*Palaeocarcharias* as basal to all galeomorphs is probably related to the fact the analysis failed to detect unambiguous synapomorphies uniting †*Palaeocarcharias* to any of the living galeomorph sharks. In fact, Landemaine et al. (2018) did not include most of the cranial or postcranial skeletal characters for †*Palaeocarcharias*, resulting in 65% of missing characters for this taxon in their matrix. Excluding phylogenetic uninformative characters, it resulted even in 68% of missing characters in our matrix. Currently, this analysis therefore cannot resolve the phylogenetic relationships of †*Palaeocarcharias* beyond doubt until a robust comprehensive morphological analysis including tooth, cranial and postcranial skeletal characters will be provided.

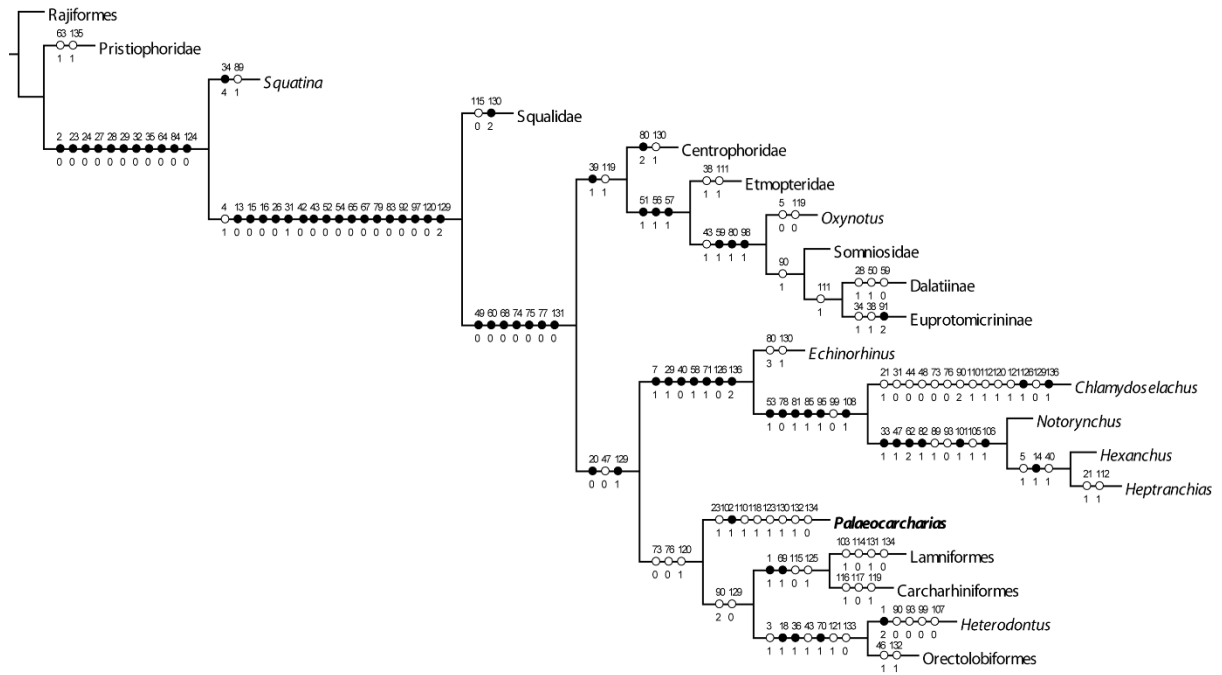

**Figure S4.** The single tree retrieved using both TNT and WinClada softwares and based on 136 morphological characters and 20 taxa, showing the hypothetical relationships of †*Palaeocarcharias*. The white circles are the homoplastic characters. The numbers above the circles are the characters of the list in Supplementary Note S1, the numbers below are character states.

## Supplementary Note S1: Modified character list

Here below is the modified character list after the exclusion of the phylogenetic uninformative characters of Landmaine et al. (2018) (i.e., their chs. 20, 23, 31, 33, 36-39, 44, 46, 49-51, 68, 71, 76, 77, 79, 80, 87-89, 91, 98, 102-105, 110, 116, 117, 119, 122, 126, 137, 138, 141, 147, 157, 159, 160, 162, 165-167, 169-177, 179, 181, 182, 186, 187, 194, 197, 198).

1. rostral process
2. precerebral fossa
3. ethmoidal region of neurocranium
4. ethmoidal canal
5. subnasal fenestra
6. superficial ophthalmic nerve
7. ectethmoid process
8. orbital articulation
9. suborbital shelf
10. basitrabecular process
11. postorbital articulation
12. hyomandibular fossa in the posterior part
13. hyomandibular fossa not composed
14. concavity ventral to hyomandibular fossa
15. basioccipital fovea
16. occipital hemicentrum
17. beta-slip of obliquus
18. nasoral groove
19. mesonarial flap
20. spiracle valve
21. basihyal elongated
22. internal lobe of anterior
23. basihyal about
24. preorbital canal
25. ethmoidal nerve
26. exit of ethmoidal canal
27. entrance of ethmoidal canal
28. profundus canal
29. antorbital (ectethmoid) process
30. eye-stalk



31. basal angle
32. rostral process
33. hyoid arch
34. genio-coracoideus
35. uncovered precerebral fossa
36. nasal capsule almost attached to orbit
37. craniopalatine articulation
38. rectus externus
39. suborbitalis muscle
40. lateral line sensory canal
41. absence of extrabranial cartilages
42. adductor mandibulae not divided
43. suborbitalis inserting on adductor mandibulae
44. adductor mandibulae superficialis absent
45. adductor mandibulae superficialis inserting on subcutaneous tissue
46. levator palatoquadrati muscle not separated from spiracularis
47. constrictor hyoideus dorsalis inserting on hyomandibula
48. arcualis dorsalis composed of single slip
49. supraneurals rudimentary
50. interpharyngobranchialis present
51. genio-coracoideus originating on fascia-covering coraco-arcualis
52. coraco-hyomandibularis muscle absent
53. three columns of heart valves
54. inclinator dorsalis muscle
55. flexor caudalis muscle restricted
56. luminous organs absent
57. parietalis muscle present
58. suborbitalis not arising from antorbital cartilage
59. suborbitalis inserting on lower jaw through
60. suborbitalis not originating from suborbital surface
61. adductor mandibulae superficialis with one insertion dorsally
62. constrictor hyoideus
63. subspinalis externus absent
64. coraco-hyomandibularis absent
65. ventral bundle musculature of caudal region
66. flexor caudalis muscles not expanding anteriorly
67. inclinator dorsalis muscle with origins

68. plate-like supraneurals
69. suborbitalis muscle not originating posterior aspect of nasal capsule
70. suborbitalis muscle not originating on upper preorbital wall
71. notochord constricted along entire vertebral column
72. suborbitalis muscle originating on suborbital shelf
73. hemal spines not forming complete arches
74. precaudal hemal process not elongated
75. precaudal longitudinal ridges
76. hemal arches poorly developed
77. basiventral process of precaudal region
78. coracoids fused
79. single facet for the articulation
80. pectoral basals separated into three distinct cartilages
81. pectoral propterygium articulating with radials
82. short proximal segment of metapterygium
83. single articular condyle on pectoral girdle
84. separate condyle for propterygium
85. pectoral propterygium with radials
86. propterygium not directed anteriorly
87. ventral marginal cartilage of clasper
88. pelvic girdle (puboischiadic bar) not very elongated
89. anterior pelvic basal
90. dorsal fin endoskeleton
91. both dorsal fins with triangular
92. basal plates not anchored
93. anal fin skeleton composed of basal cartilage and radials
94. anal fin present
95. sixth branchial unit
96. seventh branchial unit
97. anterior basibranchial
98. hypobranchial bar
99. posteriormost elements of dorsal gill arches
100. pharyngobranchial blade
101. paired basibranchials
102. tooth crown devoid of an apron
103. less than two dorsal labial cartilages
104. ventral labial cartilage

105. less than one ventral labial cartilage
106. dorsal and ventral labial cartilages not fused
107. dorsal fin spines present
108. number of dorsal fins
109. large paired fins
110. small and round tips of paired fins
111. rounded and small dorsal fins
112. longitudinal extension of base
113. clutching-type dentition
114. tearing-type dentition
115. cutting-type dentition
116. cutting-clutching-type dentition
117. crushing-type dentition
118. grinding-type dentition
119. dignathic heterodonty
120. anaulacorhizouse type
121. hemiaulacorizous
122. holaulacorhizous
123. lateral cusplets
124. coracobranchialis 1 inserting on the basihyal and/or hyoid cartilage
125. pectoral fin radials aplesodic
126. primary calcification of vertebrae
127. secondary calcification of vertebrae
128. dorsal fin dual
129. lower jaw teeth arranged diagonally
130. upper jaw teeth arranged diagonally
131. precaudal keel absent
132. dermal cephalic lobe
133. tooth crown with uvula
134. crown with labio-basal coronal extension
135. tooth roots with only one median labio-lingo canal
136. outline of the basal root face

**Table S8. Modified character matrix**

|                           | 1 | 2 | 3 | 4 | 5 | 6 | 7 | 8 | 9 | 10 | 11 | 12 | 13 | 14 | 15 | 16 | 17 | 18 | 19 | 20 | 21 | 22 | 23 | 24 | 25 | 26 | 27 | 28 | 29 | 30 |
|---------------------------|---|---|---|---|---|---|---|---|---|----|----|----|----|----|----|----|----|----|----|----|----|----|----|----|----|----|----|----|----|----|
| Rajiformes                | 0 | 1 | 1 | 2 | 0 | 0 | 3 | 0 | 1 | 0  | 0  | 0  | 1  | 0  | 1  | 1  | 0  | 0  | 1  | 1  | 0  | 1  | 1  | 1  | 1  | 1  | 1  | 1  | 2  | 0  |
| <i>Heterodontus</i>       | 2 | 0 | 1 | 0 | 0 | 0 | 0 | 0 | 0 | 0  | 0  | 1  | 0  | 0  | 0  | 0  | 0  | 1  | 0  | 0  | 0  | 0  | 0  | 0  | 0  | ?  | ?  | 0  | 0  | 0  |
| Orectolobiformes          | 0 | 0 | 1 | 0 | 0 | 1 | 0 | 0 | 0 | 0  | 0  | 1  | 0  | 0  | 0  | 0  | 0  | 1  | 0  | 0  | 0  | 0  | 0  | 0  | 0  | ?  | ?  | 0  | 0  | 0  |
| Lamniformes               | 1 | 0 | 0 | 0 | 0 | 1 | 0 | 0 | 0 | 0  | 0  | 1  | 0  | 0  | 0  | 0  | 0  | 0  | 0  | 0  | 0  | 0  | 0  | 0  | 0  | ?  | ?  | 0  | 0  | 0  |
| Carcharhiniformes         | 1 | 0 | 0 | 0 | 0 | 1 | 0 | 0 | 0 | 0  | 0  | 1  | 0  | 0  | 0  | 0  | 0  | 0  | 0  | 0  | 0  | 0  | 0  | 0  | 0  | ?  | ?  | 0  | 0  | 0  |
| <i>Chlamydoselachus</i>   | 0 | 0 | 0 | 0 | 0 | 0 | 1 | 1 | 1 | 1  | 1  | 0  | 0  | 0  | 0  | 0  | 0  | 0  | 0  | 0  | 1  | 0  | 0  | 0  | 0  | ?  | ?  | 0  | 1  | 0  |
| <i>Hexanchus</i>          | 0 | 0 | 0 | 1 | 1 | 0 | 1 | 1 | 1 | 1  | 2  | 0  | 0  | 1  | 0  | 1  | 0  | 0  | 0  | 0  | 0  | 0  | 0  | 0  | 0  | 1  | 0  | 0  | 1  | 0  |
| <i>Notorynchus</i>        | 0 | 0 | 0 | 0 | 0 | 0 | 1 | 1 | 1 | 1  | 2  | 0  | 0  | 0  | 0  | 1  | 0  | 0  | 0  | 0  | 0  | 0  | 0  | 0  | 0  | ?  | ?  | 0  | 1  | 0  |
| <i>Hepranchias</i>        | 0 | 0 | 0 | 1 | 1 | 0 | 1 | 1 | 1 | 1  | 2  | 0  | 0  | 1  | 0  | 1  | 0  | 0  | 0  | 1  | 0  | 0  | 0  | 1  | 0  | 0  | 0  | 0  | 1  | 0  |
| <i>Echinorhinus</i>       | 0 | 0 | 0 | 1 | 0 | 0 | 1 | 1 | 1 | 1  | 0  | 0  | 0  | 0  | 0  | 1  | 0  | 0  | 1  | 0  | 0  | 1  | 0  | 0  | 1  | 0  | 0  | 0  | 1  | 0  |
| Etmopteridae              | 0 | 0 | 0 | 1 | 1 | 0 | 0 | 1 | 1 | 1  | 0  | 0  | 0  | 0  | 0  | 0  | 0  | 0  | 1  | 1  | 0  | 1  | 0  | 0  | 1  | 0  | 0  | 0  | 0  | 1  |
| Somniosidae               | 0 | 0 | 0 | 1 | 1 | 0 | 0 | 1 | 1 | 1  | 0  | 0  | 0  | 0  | 0  | 0  | 0  | 0  | 1  | 1  | 0  | 1  | 0  | 0  | 1  | 0  | 0  | 0  | 0  | 0  |
| <i>Oxynotus</i>           | 0 | 0 | 0 | 1 | 0 | 0 | 0 | 1 | 1 | 1  | 0  | 0  | 0  | 0  | 0  | 0  | 0  | 0  | 1  | 1  | 0  | 1  | 0  | 0  | 1  | 0  | 0  | 0  | 0  | 1  |
| Dalatiinae                | 0 | 0 | 0 | 1 | 1 | 0 | 0 | 1 | 1 | 1  | 0  | 0  | 0  | 0  | 0  | 0  | 0  | 0  | 1  | 1  | 0  | 1  | 0  | 0  | 1  | 0  | 0  | 1  | 0  | 0  |
| Euprotomicrininae         | 0 | 0 | 0 | 1 | 1 | 0 | 0 | 1 | 1 | 1  | 0  | 0  | 0  | 0  | 0  | 0  | 0  | 0  | 1  | 1  | 0  | 1  | 0  | 0  | 1  | 0  | 0  | 0  | 0  | 0  |
| Centrophoridae            | 0 | 0 | 0 | 1 | 1 | 0 | 0 | 1 | 1 | 1  | 0  | 0  | 0  | 0  | 0  | 0  | 0  | 0  | 1  | 1  | 0  | 1  | 0  | 0  | 1  | 0  | 0  | 0  | 0  | 0  |
| Squalidae                 | 0 | 0 | 0 | 1 | 1 | 0 | 0 | 1 | 1 | 1  | 0  | 0  | 0  | 0  | 0  | 0  | 0  | 0  | 1  | 1  | 0  | 1  | 0  | 0  | 1  | 0  | 0  | 0  | 0  | 0  |
| <i>Squatina</i>           | 0 | 0 | 0 | 2 | 0 | 0 | 0 | 1 | 1 | 1  | 0  | 0  | 1  | 0  | 1  | 1  | 1  | 0  | 1  | 1  | 0  | 1  | 0  | 0  | 1  | 1  | 0  | 0  | 0  | 0  |
| Pristiophoridae           | 0 | 1 | 0 | 2 | 0 | 0 | 2 | 1 | 1 | 1  | 0  | 0  | 1  | 0  | 1  | 1  | 1  | 0  | 1  | 1  | 0  | 1  | 1  | 1  | 1  | 1  | 1  | 1  | 2  | 0  |
| † <i>Palaeocarcharias</i> | ? | ? | ? | ? | ? | ? | ? | ? | ? | ?  | ?  | ?  | ?  | ?  | ?  | ?  | ?  | ?  | ?  | ?  | ?  | ?  | ?  | 1  | ?  | ?  | ?  | ?  | ?  | ?  |

  

|                         | 31 | 32 | 33 | 34 | 35 | 36 | 37 | 38 | 39 | 40 | 41 | 42 | 43 | 44 | 45 | 46 | 47 | 48 | 49 | 50 | 51 | 52 | 53 | 54 | 55 | 56 | 57 | 58 | 59 | 60 |   |
|-------------------------|----|----|----|----|----|----|----|----|----|----|----|----|----|----|----|----|----|----|----|----|----|----|----|----|----|----|----|----|----|----|---|
| Rajiformes              | 0  | 1  | 0  | 0  | 1  | 0  | 2  | 0  | 0  | 1  | 2  | 1  | 2  | 1  | 2  | 1  | 0  | 0  | 1  | 1  | 0  | 1  | 0  | 1  | 2  | 0  | 0  | 0  | 0  | 1  |   |
| <i>Heterodontus</i>     | 0  | 0  | 0  | 0  | 0  | 1  | 0  | 0  | 0  | 1  | 1  | 0  | 1  | 1  | 0  | 0  | 0  | 0  | 0  | 0  | 0  | 0  | 0  | 0  | 0  | 0  | 0  | 0  | 0  | 0  |   |
| Orectolobiformes        | 0  | 0  | 0  | 0  | 0  | 1  | 0  | 0  | 0  | 1  | 1  | ?  | 1  | 0  | ?  | 1  | 0  | 0  | 0  | 0  | 0  | 0  | 0  | 0  | 0  | 0  | 0  | 0  | 0  | 0  |   |
| Lamniformes             | 0  | 0  | 0  | 0  | 0  | 0  | 0  | 0  | 0  | 1  | 1  | 0  | 0  | 0  | ?  | 0  | 0  | 0  | 0  | 0  | 0  | 0  | 0  | 0  | 0  | 0  | 0  | 0  | 0  | 0  |   |
| Carcharhiniformes       | 0  | 0  | 0  | 0  | 0  | 0  | 0  | 0  | 0  | 1  | 1  | 0  | 0  | 0  | ?  | 0  | 0  | 0  | 0  | 0  | 0  | 0  | 0  | 0  | 0  | 0  | 0  | 0  | 0  | 0  |   |
| <i>Chlamydoselachus</i> | 0  | 0  | 0  | 0  | 0  | 0  | 1  | 0  | 0  | 0  | 0  | 0  | 0  | 0  | ?  | 0  | 0  | 0  | 0  | 0  | 0  | 0  | 1  | 0  | 0  | 0  | 0  | 1  | 0  | 0  |   |
| <i>Hexanchus</i>        | 1  | 0  | 1  | 0  | 0  | 0  | 1  | 0  | 0  | 1  | 1  | 0  | 0  | 1  | 1  | 0  | 1  | 1  | 0  | 0  | 0  | 0  | 1  | 0  | 0  | 0  | 0  | 1  | 0  | 0  |   |
| <i>Notorynchus</i>      | 1  | 0  | 1  | 0  | 0  | 0  | 1  | 0  | 0  | 0  | 1  | 0  | 0  | 1  | 1  | 0  | 1  | 1  | 0  | 0  | 0  | 0  | 1  | 0  | 0  | 0  | 0  | 1  | 0  | 0  |   |
| <i>Hepranchias</i>      | 1  | 0  | 1  | 0  | 0  | 0  | 1  | 0  | 0  | 1  | 1  | 0  | 0  | 1  | 1  | 0  | 1  | 1  | 0  | 0  | 0  | 0  | 1  | 0  | 0  | 0  | 0  | 0  | 1  | 0  | 0 |
| <i>Echinorhinus</i>     | 1  | 0  | 0  | 0  | 0  | 0  | 1  | 0  | 0  | 0  | 2  | 0  | 0  | 1  | 3  | 0  | 0  | 1  | 0  | 0  | 0  | 0  | 0  | 0  | 0  | 0  | 0  | 1  | 0  | 0  |   |
| Etmopteridae            | 1  | 0  | 0  | 1  | 0  | 0  | 1  | 1  | 1  | 1  | 2  | 0  | 0  | 1  | 0  | 0  | 2  | 1  | 0  | 0  | 1  | 0  | 0  | 0  | 0  | 1  | 1  | 0  | 0  | 0  |   |
| Somniosidae             | 1  | 0  | 0  | 2  | 0  | 0  | 1  | 0  | 1  | 1  | 2  | 0  | 1  | 1  | 0  | 0  | 2  | 1  | 0  | 0  | 1  | 0  | 0  | 0  | 0  | 1  | 1  | 0  | 1  | 0  |   |
| <i>Oxynotus</i>         | 1  | 0  | 0  | 2  | 0  | 0  | 1  | 0  | 1  | 1  | 2  | 0  | 1  | 1  | 0  | 0  | 2  | 1  | 0  | 0  | 1  | 0  | 0  | 0  | 0  | 1  | 1  | 0  | 1  | 0  |   |
| Dalatiinae              | 1  | 0  | 0  | 2  | 0  | 0  | 1  | 0  | 1  | 1  | 2  | 0  | 1  | 1  | 0  | 0  | 2  | 1  | 0  | 1  | 1  | 0  | 0  | 0  | 0  | 1  | 1  | 0  | 0  | 0  |   |

|                           |   |   |   |   |   |   |   |   |   |   |   |   |   |   |   |   |   |   |   |   |   |   |   |   |   |   |   |   |   |   |
|---------------------------|---|---|---|---|---|---|---|---|---|---|---|---|---|---|---|---|---|---|---|---|---|---|---|---|---|---|---|---|---|---|
| Euprotomicrininae         | 1 | 0 | 0 | 1 | 0 | 0 | 1 | 1 | 1 | 1 | 2 | 0 | 1 | 1 | 0 | 0 | 2 | 1 | 0 | 0 | 1 | 0 | 0 | 0 | 1 | 1 | 0 | 1 | 0 |   |
| Centrophoridae            | 1 | 0 | 0 | 0 | 0 | 0 | 1 | 0 | 1 | 1 | 2 | 0 | 0 | 1 | 0 | 0 | 2 | 1 | 0 | 0 | 0 | 0 | 0 | 0 | 0 | 0 | 0 | 0 | 0 |   |
| Squalidae                 | 1 | 0 | 0 | 0 | 0 | 0 | 1 | 0 | 0 | 1 | 2 | 0 | 0 | 1 | 0 | 0 | 2 | 1 | 1 | 0 | 0 | 0 | 0 | 1 | 0 | 0 | 0 | 0 | 1 |   |
| <i>Squatina</i>           | 0 | 0 | 0 | 4 | 0 | 0 | 1 | 0 | ? | 1 | 2 | 1 | 2 | 1 | 0 | 0 | 2 | 1 | 1 | 0 | 0 | 1 | 0 | 1 | 2 | 0 | 0 | ? | ? | ? |
| Pristiophoridae           | 0 | 1 | 0 | 0 | 1 | 0 | 1 | 0 | 0 | 1 | 2 | 1 | 2 | 1 | 0 | 0 | 2 | 1 | 1 | 0 | 0 | 1 | 0 | 1 | 2 | 0 | 0 | 0 | 0 | 1 |
| † <i>Palaeocarcharias</i> | ? | ? | ? | ? | ? | ? | ? | ? | ? | ? | ? | ? | ? | ? | ? | ? | ? | ? | ? | ? | ? | ? | ? | ? | ? | 0 | ? | ? | ? | ? |

|                           | 61 | 62 | 63 | 64 | 65 | 66 | 67 | 68 | 69 | 70 | 71 | 72 | 73 | 74 | 75 | 76 | 77 | 78 | 79 | 80 | 81 | 82 | 83 | 84 | 85 | 86 | 87 | 88 | 89 | 90 |
|---------------------------|----|----|----|----|----|----|----|----|----|----|----|----|----|----|----|----|----|----|----|----|----|----|----|----|----|----|----|----|----|----|
| Rajiformes                | 0  | 0  | 0  | 1  | 1  | 2  | 1  | 1  | 0  | 0  | 0  | 0  | 1  | 1  | 1  | 1  | 1  | 1  | 2  | 0  | 0  | 0  | 1  | 1  | 0  | 1  | 0  | 1  | 0  | 1  |
| <i>Heterodontus</i>       | 0  | 0  | 0  | 0  | 0  | 0  | 0  | 0  | 0  | 1  | 0  | 4  | 0  | 0  | 0  | 0  | 0  | 1  | 0  | 0  | 0  | 0  | 0  | 0  | 0  | 0  | 0  | 0  | 0  | 0  |
| Orectolobiformes          | 0  | 0  | 0  | 0  | 0  | 0  | 0  | 0  | 0  | 1  | 0  | 4  | 0  | 0  | 0  | 0  | 0  | 1  | 0  | 0  | 0  | 0  | 0  | 0  | 0  | 0  | 1  | 0  | 0  | 2  |
| Lamniformes               | 0  | 0  | 0  | 0  | 0  | 0  | 0  | 0  | 1  | 0  | 0  | 2  | 0  | 0  | 0  | 0  | 0  | 1  | 0  | 0  | 0  | 0  | 0  | 0  | 0  | 0  | 1  | 0  | 0  | 2  |
| Carcharhiniformes         | 0  | 0  | 0  | 0  | 0  | 0  | 0  | 0  | 1  | 0  | 0  | 2  | 0  | 0  | 0  | 0  | 0  | 1  | 0  | 0  | 0  | 0  | 0  | 0  | 0  | 0  | 1  | 0  | 0  | 2  |
| <i>Chlamydoselachus</i>   | ?  | 0  | 1  | 0  | 0  | 0  | 0  | 0  | 0  | 0  | 1  | 3  | 0  | 0  | 0  | 0  | 0  | 0  | 0  | 0  | 1  | 0  | 0  | 0  | 1  | 0  | 0  | 0  | 0  | 2  |
| <i>Hexanchus</i>          | 1  | 2  | 0  | 0  | 0  | 0  | 0  | 0  | 0  | 0  | 1  | 3  | 1  | 0  | 0  | 1  | 0  | 0  | 0  | 0  | 1  | 1  | 0  | 0  | 1  | 0  | 0  | 0  | 1  | 1  |
| <i>Notorynchus</i>        | 1  | 2  | 0  | 0  | 0  | 0  | 0  | 0  | 0  | 0  | 1  | 3  | 1  | 0  | 0  | 1  | 0  | 0  | 0  | 0  | 1  | 1  | 0  | 0  | 1  | 0  | 0  | 0  | 1  | 1  |
| <i>Hepranchias</i>        | 1  | 2  | 0  | 0  | 0  | 0  | 0  | 0  | 0  | 0  | 1  | 3  | 1  | 0  | 0  | 1  | 0  | 0  | 0  | 0  | 1  | 1  | 0  | 0  | 1  | 0  | 0  | 0  | 1  | 1  |
| <i>Echinorhinus</i>       | 0  | 0  | 1  | 0  | 0  | 0  | 0  | 0  | 0  | 0  | 1  | 3  | 1  | 0  | 0  | 1  | 0  | 1  | 0  | 3  | 0  | 0  | 0  | 0  | 0  | 0  | 0  | 0  | 0  | 1  |
| Etmopteridae              | 0  | 1  | 0  | 0  | 0  | 0  | 0  | 0  | 0  | 0  | 0  | 1  | 1  | 0  | 0  | 1  | 0  | 1  | 0  | 0  | 0  | 0  | 0  | 0  | 0  | 0  | 0  | 0  | 0  | 0  |
| Somniosidae               | 0  | 1  | 0  | 0  | 0  | 0  | 0  | 0  | 0  | 0  | 0  | 1  | 1  | 0  | 0  | 1  | 0  | 1  | 0  | 1  | 0  | 0  | 0  | 0  | 0  | 0  | 0  | 0  | 0  | 1  |
| <i>Oxynotus</i>           | 0  | 1  | 0  | 0  | 0  | 0  | 0  | 0  | 0  | 0  | 0  | 1  | 1  | 0  | 0  | 1  | 0  | 1  | 0  | 1  | 0  | 0  | 0  | 0  | 0  | 0  | 0  | 0  | 0  | 0  |
| Dalatiinae                | 0  | 1  | 0  | 0  | 0  | 0  | 0  | 0  | 0  | 0  | 0  | 1  | 1  | 0  | 0  | 1  | 0  | 1  | 0  | 4  | 0  | 0  | 0  | 0  | 0  | 0  | 0  | 0  | 0  | 1  |
| Euprotomicrininae         | 0  | 1  | 0  | 0  | 0  | 0  | 0  | 0  | 0  | 0  | 0  | 1  | 1  | 0  | 0  | 1  | 0  | 1  | 0  | 3  | 0  | 0  | 0  | 0  | 0  | 0  | 0  | 0  | 0  | 1  |
| Centrophoridae            | 0  | 1  | 0  | 0  | 0  | 0  | 0  | 0  | 0  | 0  | 0  | 1  | 1  | 0  | 0  | 1  | 0  | 1  | 0  | 2  | 0  | 0  | 0  | 0  | 0  | 0  | 0  | 0  | 0  | 0  |
| Squalidae                 | 0  | 1  | 0  | 0  | 0  | 1  | 0  | 1  | 0  | 0  | 0  | 0  | 1  | 1  | 1  | 1  | 1  | 1  | 0  | 0  | 0  | 0  | 0  | 0  | 0  | 0  | 0  | 0  | 0  | 0  |
| <i>Squatina</i>           | 0  | 0  | 0  | 0  | 1  | 2  | 1  | 1  | ?  | ?  | 0  | ?  | 1  | 1  | 1  | 1  | 1  | 1  | 2  | 0  | 0  | 0  | 1  | 0  | 0  | 1  | 0  | 1  | 1  | 1  |
| Pristiophoridae           | 0  | 1  | 1  | 1  | 1  | 2  | 1  | 1  | 0  | 0  | 0  | 0  | 1  | 1  | 1  | 1  | 1  | 1  | 2  | 0  | 0  | 0  | 1  | 1  | 0  | 0  | 0  | 0  | 0  | 1  |
| † <i>Palaeocarcharias</i> | ?  | ?  | ?  | ?  | ?  | ?  | ?  | 0  | ?  | ?  | 0  | ?  | 0  | 0  | ?  | 0  | ?  | ?  | ?  | ?  | ?  | ?  | 0  | ?  | ?  | ?  | ?  | 0  | ?  | 1  |

|                         | 91 | 92 | 93 | 94 | 95 | 96 | 97 | 98 | 99 | 100 | 101 | 102  | 103  | 104  | 105 | 106 | 107  | 108  | 109  | 110  | 111  | 112  | 113 | 114 | 115 | 116 | 117 | 118 | 119 | 120 |   |
|-------------------------|----|----|----|----|----|----|----|----|----|-----|-----|------|------|------|-----|-----|------|------|------|------|------|------|-----|-----|-----|-----|-----|-----|-----|-----|---|
| Rajiformes              | 0  | 1  | ?  | 1  | 0  | 0  | 1  | 0  | 1  | 0   | 0   | 2    | 0    | 1    | 1   | ?   | 1    | 0    | 0    | 0    | 0    | 0    | 0   | 0   | 0   | 0   | 0   | 0   | 0   | 1   |   |
| <i>Heterodontus</i>     | ?  | ?  | 0  | 0  | 0  | 0  | 0  | 0  | 0  | 1   | 0   | 2    | 0    | 0    | 0   | 0   | 0    | 0    | 0    | 0    | 0    | 0    | 0   | 1   | 1   | 0   | 1   | 0   | 0   | 1   |   |
| Orectolobiformes        | ?  | ?  | 1  | 0  | 0  | 0  | 0  | 0  | 1  | 1   | 0   | 2    | 0    | 0    | 0   | 0   | 1    | 0    | [01] | [01] | [01] | [01] | 1   | 1   | 1   | 0   | 1   | 0   | 0   | 1   |   |
| Lamniformes             | ?  | ?  | 1  | 0  | 0  | 0  | 0  | 0  | 1  | 1   | 0   | [01] | 1    | 1    | 1   | 0   | 1    | 0    | 0    | 0    | 0    | 0    | 0   | 0   | 0   | 0   | 1   | 0   | 0   | 1   |   |
| Carcharhiniformes       | ?  | ?  | 1  | 0  | 0  | 0  | 0  | 0  | 1  | 1   | 0   | 0    | [01] | [01] | 0   | 1   | [01] | [01] | [01] | [01] | [01] | 1    | 1   | 0   | 1   | 0   | 0   | 1   | 1   | 1   |   |
| <i>Chlamydoselachus</i> | ?  | 0  | 1  | 0  | 1  | 0  | 0  | 0  | 0  | 0   | 0   | 0    | 0    | 0    | 0   | 1   | 1    | 1    | 1    | 0    | 1    | 0    | 1   | 1   | 1   | 1   | 1   | 0   | 0   | 1   |   |
| <i>Hexanchus</i>        | 1  | 0  | 0  | 0  | 1  | 0  | 0  | 0  | 0  | 0   | 1   | 0    | 1    | 0    | 1   | 1   | 1    | 1    | 0    | 0    | 0    | 0    | 0   | 1   | 1   | 1   | 1   | 1   | 0   | 0   | 0 |
| <i>Notorynchus</i>      | 1  | 0  | 0  | 0  | 1  | 1  | 0  | 0  | 0  | 0   | 1   | 0    | 1    | 0    | 1   | 1   | 1    | 1    | 0    | 0    | 0    | 0    | 0   | 1   | 1   | 1   | 1   | 1   | 0   | 0   | 0 |
| <i>Hepranchias</i>      | 1  | 0  | 0  | 0  | 1  | 1  | 0  | 0  | 0  | 0   | 1   | 0    | 0    | 0    | 1   | 1   | 1    | 1    | 1    | 0    | 0    | 1    | 0   | 1   | 1   | 1   | 1   | 1   | 0   | 0   | 0 |
| <i>Echinorhinus</i>     | 0  | 0  | ?  | 1  | 0  | 0  | 0  | 0  | 1  | 0   | 0   | 0    | 0    | 0    | 0   | 0   | 1    | 0    | 1    | 0    | 0    | 0    | 0   | 1   | 1   | 0   | 1   | 0   | 0   | 0   |   |

|                           |   |   |   |   |   |   |   |   |   |   |   |   |   |   |   |   |      |   |   |   |   |   |   |   |   |   |   |   |   |   |
|---------------------------|---|---|---|---|---|---|---|---|---|---|---|---|---|---|---|---|------|---|---|---|---|---|---|---|---|---|---|---|---|---|
| Etmopteridae              | 0 | 0 | ? | 1 | 0 | 0 | 0 | 0 | 1 | 0 | 0 | 2 | 0 | 0 | 0 | 0 | 0    | 1 | 0 | 1 | 0 | 0 | 1 | 1 | 1 | 1 | 0 | 1 | 0 |   |
| Somniosidae               | 0 | 0 | ? | 1 | 0 | 0 | 0 | 1 | 1 | 0 | 0 | 2 | 0 | 0 | 0 | 0 | [01] | 0 | 1 | 0 | 0 | 0 | 0 | 1 | 1 | 1 | 1 | 0 | 1 | 0 |
| <i>Oxynotus</i>           | 0 | 0 | ? | 1 | 0 | 0 | 0 | 1 | 1 | 0 | 0 | 2 | 0 | 0 | 0 | 0 | 0    | 0 | 0 | 0 | 0 | 0 | 0 | 1 | 1 | 1 | 1 | 0 | 0 | 0 |
| Dalatiinae                | 0 | 0 | ? | 1 | 0 | 0 | 0 | 1 | 1 | 0 | 0 | 2 | 0 | 0 | 0 | 0 | 1    | 0 | 1 | 0 | 1 | 0 | 0 | 1 | 1 | 1 | 1 | 0 | 1 | 0 |
| Euprotomicrininae         | 2 | 0 | ? | 1 | 0 | 0 | 0 | 1 | 1 | 0 | 0 | 2 | 0 | 0 | 0 | 0 | 1    | 0 | 1 | 0 | 1 | 0 | 0 | 1 | 1 | 1 | 1 | 0 | 1 | 0 |
| Centrophoridae            | 0 | 0 | ? | 1 | 0 | 0 | 0 | 0 | 1 | 0 | 0 | 2 | 0 | 0 | 0 | 0 | 0    | 0 | 0 | 0 | 0 | 0 | 0 | 1 | 1 | 1 | 1 | 0 | 1 | 0 |
| Squalidae                 | 0 | 0 | ? | 1 | 0 | 0 | 0 | 0 | 1 | 0 | 0 | 2 | 0 | 0 | 0 | 0 | 0    | 0 | 0 | 0 | 0 | 0 | 0 | 1 | 0 | 1 | 1 | 0 | 0 | 0 |
| <i>Squatina</i>           | 0 | 1 | ? | 1 | 0 | 0 | 1 | 0 | 1 | 0 | 0 | 2 | 0 | 0 | 0 | 0 | 1    | 0 | 0 | 0 | 1 | 0 | 1 | 1 | 1 | 0 | 1 | 1 | 0 | 1 |
| Pristiophoridae           | 0 | 1 | ? | 1 | 0 | 0 | 1 | 0 | 1 | 0 | 0 | 2 | ? | ? | ? | ? | 1    | 0 | 0 | 0 | 1 | 0 | 1 | 1 | 1 | 0 | 1 | 1 | 0 | 1 |
| † <i>Palaeocarcharias</i> | ? | 0 | 1 | 0 | 0 | 0 | ? | 0 | ? | ? | ? | 1 | ? | ? | ? | ? | 1    | ? | 0 | 1 | 0 | 0 | 1 | 1 | 1 | 0 | 1 | 1 | 0 | 1 |

|                           | 121 | 122 | 123  | 124 | 125 | 126 | 127 | 128 | 129 | 130 | 131 | 132 | 133 | 134 | 135 | 136 |  |  |  |  |  |  |  |  |  |  |
|---------------------------|-----|-----|------|-----|-----|-----|-----|-----|-----|-----|-----|-----|-----|-----|-----|-----|--|--|--|--|--|--|--|--|--|--|
| Rajiformes                | 0   | 1   | 0    | 1   | 1   | 2   | 3   | 3   | 0   | 0   | 1   | 0   | 0   | 1   | 0   | 0   |  |  |  |  |  |  |  |  |  |  |
| <i>Heterodontus</i>       | 1   | 0   | 0    | 0   | 0   | 2   | 0   | 0   | 0   | 0   | 0   | 0   | 0   | 1   | 0   | 0   |  |  |  |  |  |  |  |  |  |  |
| Orectolobiformes          | 1   | 0   | 0    | 0   | 0   | 2   | 1   | 0   | 0   | 0   | 0   | 1   | 0   | 1   | 0   | 0   |  |  |  |  |  |  |  |  |  |  |
| Lamniformes               | 0   | 1   | [01] | 0   | 1   | 2   | 1   | 0   | 0   | 0   | 1   | 0   | 1   | 0   | 0   | 0   |  |  |  |  |  |  |  |  |  |  |
| Carcharhiniformes         | 0   | 1   | 0    | 0   | 1   | 2   | 2   | 0   | 0   | 0   | 0   | 0   | 1   | 1   | 0   | 0   |  |  |  |  |  |  |  |  |  |  |
| <i>Chlamydoselachus</i>   | 1   | 0   | 0    | 0   | 0   | 1   | 0   | 1   | 0   | 0   | 0   | 0   | 1   | 1   | 0   | 1   |  |  |  |  |  |  |  |  |  |  |
| <i>Hexanchus</i>          | 0   | 0   | 0    | 0   | 0   | 0   | 0   | 2   | 1   | 0   | 0   | 0   | 1   | 1   | 1   | 2   |  |  |  |  |  |  |  |  |  |  |
| <i>Notorynchus</i>        | 0   | 0   | 0    | 0   | 0   | 0   | 0   | 2   | 1   | 0   | 0   | 0   | 1   | 1   | 1   | 2   |  |  |  |  |  |  |  |  |  |  |
| <i>Heptanchias</i>        | 0   | 0   | 0    | 0   | 0   | 0   | 0   | 2   | 1   | 0   | 0   | 0   | 1   | 1   | 1   | 2   |  |  |  |  |  |  |  |  |  |  |
| <i>Echinorhinus</i>       | 0   | 0   | 0    | 0   | 0   | 0   | 0   | 0   | 1   | 1   | 0   | 0   | 1   | 1   | 1   | 2   |  |  |  |  |  |  |  |  |  |  |
| Etmopteridae              | 0   | 0   | 0    | 0   | 0   | 2   | 0   | 0   | 2   | 0   | 0   | 0   | ?   | ?   | ?   | ?   |  |  |  |  |  |  |  |  |  |  |
| Somniosidae               | 0   | 0   | 0    | 0   | 0   | 2   | 0   | 0   | 2   | 0   | 0   | 0   | ?   | ?   | ?   | ?   |  |  |  |  |  |  |  |  |  |  |
| <i>Oxynotus</i>           | 0   | 0   | 0    | 0   | 0   | 2   | 0   | 0   | 2   | 0   | 0   | 0   | ?   | ?   | ?   | ?   |  |  |  |  |  |  |  |  |  |  |
| Dalatiinae                | 0   | 0   | 0    | 0   | 0   | 2   | 0   | 0   | 2   | 0   | 0   | 0   | ?   | ?   | ?   | ?   |  |  |  |  |  |  |  |  |  |  |
| Euprotomicrininae         | 0   | 0   | 0    | 0   | 0   | 2   | 0   | 0   | 2   | 0   | 0   | 0   | ?   | ?   | ?   | ?   |  |  |  |  |  |  |  |  |  |  |
| Centrophoridae            | 0   | 0   | 0    | 0   | 0   | 2   | 0   | 0   | 2   | 1   | 0   | 0   | ?   | ?   | ?   | ?   |  |  |  |  |  |  |  |  |  |  |
| Squalidae                 | 0   | 0   | 0    | 0   | 0   | 2   | 0   | 0   | 2   | 2   | 1   | 0   | ?   | ?   | ?   | ?   |  |  |  |  |  |  |  |  |  |  |
| <i>Squatina</i>           | 1   | 0   | 1    | 0   | 0   | 2   | 0   | 0   | 0   | 0   | 1   | 0   | 0   | 1   | 0   | 0   |  |  |  |  |  |  |  |  |  |  |
| Pristiophoridae           | 1   | 0   | 1    | 1   | 0   | 2   | 0   | 0   | 0   | 0   | 1   | 0   | 0   | 1   | 1   | 0   |  |  |  |  |  |  |  |  |  |  |
| † <i>Palaeocarcharias</i> | 0   | 1   | 1    | ?   | 0   | ?   | ?   | 0   | 1   | 1   | ?   | 1   | 1   | 0   | 0   | 0   |  |  |  |  |  |  |  |  |  |  |

## Supplementary Literature:

- Applegate, S.P. The origin of the lamniform sharks, a study in morphology and paleontology of recent and fossil genera. American Elasmobranch Society, Annual meeting, Abstract, p. 1. (2001).
- Bernárdez, E. *Truyolsodontos estauni* n. gen., n. sp., Truyolsodontidae, a new family of lamniform sharks from the Cenomanian of northern Spain. *Ann. Paleontol.* **104**, 175-181 (2018).
- Cappetta, H. *Handbook of Paleoichthyology, Vol 3B: Chondrichthyes II*. Stuttgart. 1-192 (Gustav Fischer Verlag, 1987).
- Cappetta, H. *Handbook of Paleoichthyology, Vol 3E: Chondrichthyes - Mesozoic and Cenozoic Elasmobranchii: Teeth*. München. 1-512 (Verlag Dr. Friedrich Pfeil, 2012).
- de Beaumont, G. Observations préliminaires sur trois Sélaciens nouveaux du calcaire lithographique d'Eichstätt (Bavière). *Eclogae Geol. Helv.* **53**, 315-328 (1960).
- Duffin, C. J. The upper jurassic selachian *Palaeocarcharias* de Beaumont (1960). *Zool. J. Linn. Soc.* **94**, 271-286 (1988).
- Goloboff, P. A., Farris, J. S. & Nixon, K. C. 2008. TNT, a free program for phylogenetic analysis. *Cladistics*, **24**, 774–786.
- Goto, M. Histological structure of the teeth, dermal and mucous denticles and gill rakers of a female megamouth shark, *Megachasma pelagios*, from Hakata Bay, Japan. *ACBTE.* **6**, 9-18 (1999).
- Hoffman, B. L., Hageman, S. A., Claycomb, G. D. Scanning electron microscope examination of the dental enameloid of the Cretaceous durophagous shark *Ptychodus* supports neoselachian classification. *J. Paleontol.* **90**, 741-762 (2016).
- Jambura, P. L., Pfaff, C., Underwood, C. J., Ward, D. J., Kriwet, J. Tooth mineralization and histology patterns in extinct and extant snaggletooth sharks, *Hemipristis* (Carcharhiniformes, Hemigaleidae)-Evolutionary significance or ecological adaptation? *PLoS ONE.* **13**, e0200951; 10.1371/journal.pone.0200951 (2018).
- Kakizawa, Y. On the teeth of salmon shark, *Lamna ditropis* Hubbs & Follet. *Nihon Univ. dent. J.* **58**, 59-69 (1984).
- Klug, S. Monophyly, phylogeny and systematic position of the †Synechodontiformes (Chondrichthyes, Neoselachii). *Zool. Scr.* **39**, 37-49 (2010).
- Landemaine, O., Thies, D., Waschkewitz, J. The Late Jurassic shark *Palaeocarcharias* (Elasmobranchii, Selachimorpha) – functional morphology of teeth, dermal cephalic lobes and phylogenetic position. *Palaeontogr. Abt. A Palaeozool-Stratigr.* **312**, 103-165 (2018).

- Maddison, W. P. & Maddison, D. R. (2008). Mesquite: a modular system for evolutionary analysis. Version 3.03. Updated at: <http://mesquiteproject.org>.
- Møller, I.J., Melsen, B., Jensen, S.J., Kirkegaard E. A histological, chemical and x-ray diffraction study on contemporary (*Carcharias glaucus*) and fossilized (*Macrotia odontaspis*) shark teeth. *Archs. oral Biol.* **20**, 797-802 (1975).
- Moyer, J. K., Riccio, M. L., Bemis, W. E. Development and microstructure of tooth histotypes in the blue shark, *Prionace glauca* (Carcharhiniformes: Carcharhinidae) and the great white shark, *Carcharodon carcharias* (Lamniformes: Lamnidae). *J. Morphol.* **276**, 797-817 (2015a).
- Moyer, J. K., Hamilton, N. D., Hadlock Seeley, R., Riccio, M. L., Bemis, W. E. Identification of shark teeth (Elasmobranchii: Lamnidae) from a historic fishing station on Smuttynose Island, Maine, using computed tomography imaging. *Northeast. Nat.* **22**, 585-597 (2015b).
- Nixon, K.C. 2002. Winclada, v. 1.00.08. Program and documentation available at [www.cladistics.com](http://www.cladistics.com)
- Schnetzer, L., Pfaff, C., Kriwet, J. Tooth development and histology patterns in lamniform sharks (Elasmobranchii, Lamniformes) revisited. *J. Morphol.* **277**, 1584–1598 (2016).
- Shirai, S. Phylogenetic interrelationships of Neoselachians (Chondrichthyes: Euselachii). In: Stiassny, M.L.J., Parenti, L.R., Johnson, G.D. (eds): Interrelationships of fishes. Academic Press 9-34 (1996).
- Yabumoto, Y., Goto, M., Yano, K., Uyeno, T. Dentition of a female megamouth, *Megachasma pelagios*, collected from Hakata Bay, Japan in *Biology of the Megamouth Shark* (eds: Yano, K., Morrissey, J., F., Yabumoto, Y., Nakaya, K.) 63-75 (Tokai University Press, 1997).
